# Supplementary material
Source: PubMed Central journal article supplement (PMC9432430)
Supplement: NIHMS1804698-supplement-1.pdf [file NIHMS1804698-supplement-1.pdf]

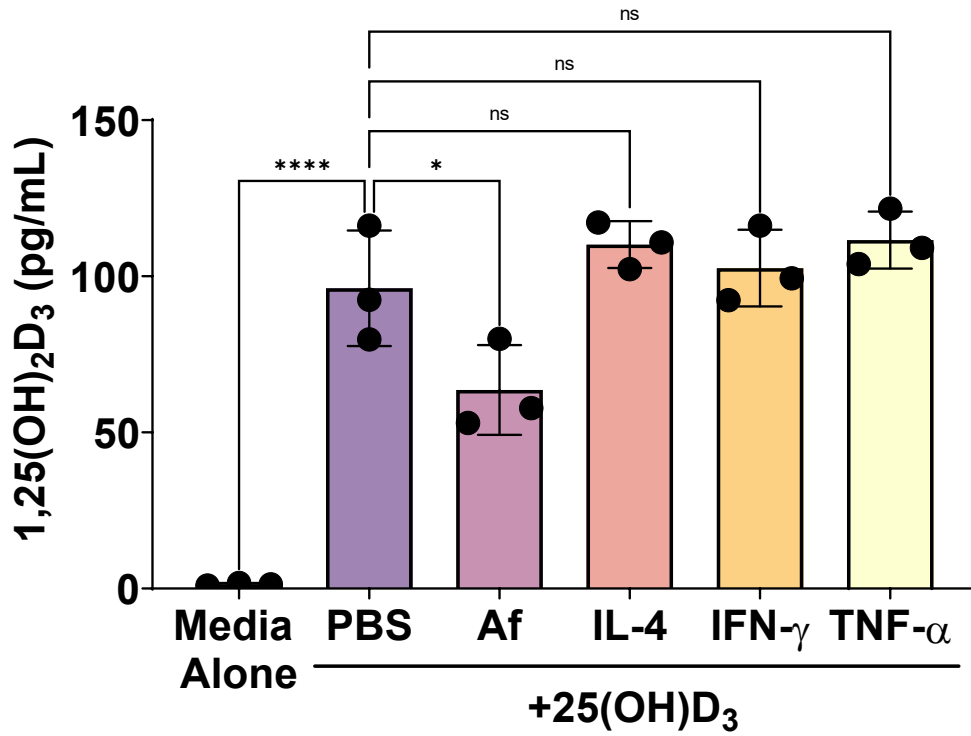

**Supplemental Figure 1: Treatment with recombinant human IFN- $\gamma$ , IL-4 or TNF- $\alpha$  does not impact 25(OH)D<sub>3</sub> to 1,25(OH)<sub>2</sub>D<sub>3</sub> metabolism by control HSNEC. \*p<0.05 between versus PBS treatment. n=3 cell lines from different individuals.**

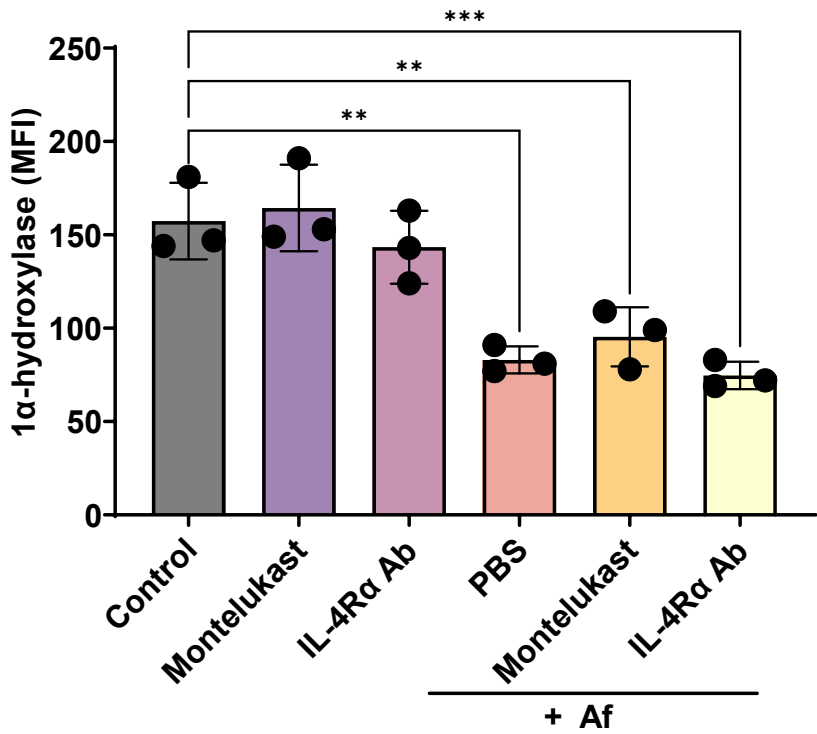

**Supplemental Figure 2: Montelukast and inhibition of the IL-4 receptor fail to block Af suppression of HSNEC 1α-hydroxylase.** Control HSNEC were treated concurrently with Af with or without treatment with montelukast or neutralizing antibody to the IL-4 receptor.
